# Supplementary material for: Identification and verification of the temozolomide resistance feature gene DACH1 in gliomas
Source: PubMed Central journal article supplement (PMC10028258; doi:10.3389/fonc.2023.1120103), 2023-03-07
Supplement: DataSheet_2.pdf [file DataSheet_2.pdf]

U251

U251TR

ns

ns

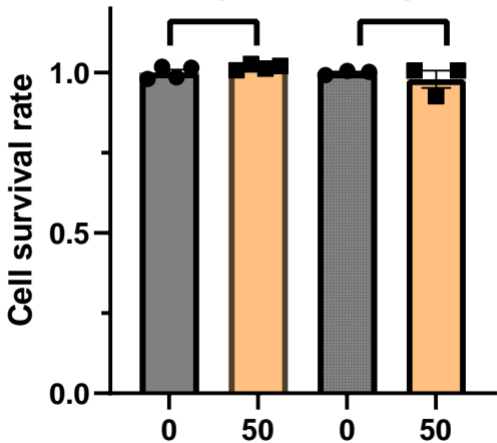

Cell survival rate

1.0

0.5

0.0

0 50 0 50

Temozolomide concentration (μM)
