# Supplementary material for: Identification and verification of the temozolomide resistance feature gene DACH1 in gliomas
Source: Front Oncol. 2023 Mar 7;13:1120103. doi: 10.3389/fonc.2023.1120103 (PMC10028258; doi:10.3389/fonc.2023.1120103)
Supplement: Supplementary file 3 [file Table_1.xlsx]

## Sheet: Sheet1
gene	HR	z	pvalue	lower	upper
ABCA1	1.41745	3.84915	0.000118529	1.18675	1.69298
AHR	1.44666	5.4078	6.38037e-08	1.26545	1.65381
ARG2	1.30267	2.08764	0.0368304	1.0163	1.66973
CD53	1.43827	5.07757	3.82283e-07	1.25001	1.65488
DACH1	0.853435	-1.99059	0.0465258	0.730129	0.997564
FABP7	1.23976	3.95858	7.53973e-05	1.11461	1.37895
GAP43	1.33995	4.29684	1.73252e-05	1.17251	1.5313
GPX7	2.13707	8.09338	5.80296e-16	1.77806	2.56856
MGMT	1.64588	4.29507	1.74638e-05	1.31114	2.06609
NEFL	0.864504	-4.15609	3.23737e-05	0.807136	0.925949
PPARGC1A	0.801662	-2.25585	0.0240798	0.66157	0.97142
PRDM1	1.46612	4.23887	2.24646e-05	1.22839	1.74985
SRGN	1.32572	4.63136	3.6327e-06	1.17661	1.49374
SULF1	1.16281	3.14139	0.00168149	1.05837	1.27755
TFAP2A	1.2784	3.47933	0.000502675	1.11322	1.46809
TGFA	0.715604	-2.56774	0.0102363	0.554299	0.92385
TP73	1.40847	5.90985	3.42416e-09	1.25723	1.57789
YAP1	1.2818	3.14867	0.00164015	1.09826	1.49602
