# Supplementary material for: Identification and verification of the temozolomide resistance feature gene DACH1 in gliomas
Source: Front Oncol. 2023 Mar 7;13:1120103. doi: 10.3389/fonc.2023.1120103 (PMC10028258; doi:10.3389/fonc.2023.1120103)
Supplement: Supplementary file 4 [file Table_2.xlsx]

## Sheet: Sheet1
ID	Description	setSize	enrichmentScore	NES	pvalue	p.adjust	qvalues	rank	leading_edge	core_enrichment
hsa05033	Nicotine addiction	36	-0.851332	-2.68783	1e-10	1.51818e-09	8.75598e-10	1649	tags=78%, list=10%, signal=70%	2892/2890/2905/2567/2555/2556/1137/1139/246213/1141/2893/2891/2565/2903/2562/116443/2563/2904/774/57030/57084/2558/2557/140679/2566/2902/2561/2554
hsa05150	Staphylococcus aureus infection	49	0.83866	2.67436	1e-10	1.51818e-09	8.75598e-10	1088	tags=71%, list=6%, signal=67%	2358/2213/9103/728/3383/3119/2212/3586/715/3117/2357/716/1675/3127/2204/718/3123/3115/2359/2214/3689/713/717/712/3122/714/3111/3875/3108/3109/3113/3075/3426/3684/5724
hsa04060	Cytokine-cytokine receptor interaction	200	0.674161	2.63249	1e-10	1.51818e-09	8.75598e-10	2484	tags=54%, list=15%, signal=47%	6364/3976/6372/3559/3557/6347/9518/23529/2921/5008/2919/3569/3556/6374/5473/51330/3586/7850/3575/9180/8740/6355/3553/3598/9966/4804/4982/6352/4055/10563/50615/4283/1234/9235/3561/7133/3627/3589/3560/8764/3554/3587/7132/2920/729230/1230/1441/7852/3566/3552/6373/1233/8784/8807/1489/1439/4050/958/8809/944/355/3606/58191/3600/10663/3460/8793/7293/920/3597/8795/2833/3574/4838/84818/51561/11009/7040/70…
hsa04640	Hematopoietic cell lineage	74	0.772906	2.62196	1e-10	1.51818e-09	8.75598e-10	2508	tags=74%, list=15%, signal=64%	3559/1378/3569/3119/3678/290/929/7850/3575/3117/3553/3675/3127/3123/3115/916/3589/3554/924/914/960/3122/3111/1441/3566/3672/3552/3108/3109/915/3113/3684/926/945/917/921/911/3676/920/925/951/3574/3118/1604/3673/2323/2056/948/3570/1436/2209/947/913/1435/7037
hsa04724	Glutamatergic synapse	106	-0.668884	-2.60786	1e-10	1.51818e-09	8.75598e-10	1649	tags=45%, list=10%, signal=41%	2892/5567/2913/2744/2890/2905/6512/1742/2784/5332/2775/2917/111/2770/2898/85358/108/5534/6506/2914/5530/3708/27165/5532/6505/2915/246213/2893/6511/2891/23236/2912/107/2911/2785/22941/9229/51764/2903/50944/116443/2904/5579/57030/57084/5582/3760/2902
hsa04061	Viral protein interaction with cytokine and cytokine receptor	71	0.762314	2.57202	1e-10	1.51818e-09	8.75598e-10	2541	tags=66%, list=15%, signal=56%	6364/6372/3559/6347/2921/2919/3569/6374/5473/3586/8740/6355/6352/4055/10563/4283/1234/3561/7133/3627/3560/8764/3587/7132/2920/729230/1230/7852/6373/1233/8807/8809/3606/8793/8795/2833/11009/9547/8794/3588/3579/3570/1436/1435/8743/2826/3577
hsa04727	GABAergic synapse	83	-0.68048	-2.54889	1e-10	1.51818e-09	8.75598e-10	2867	tags=58%, list=17%, signal=48%	5578/11345/775/6540/5334/81539/2560/773/6539/18/2786/10243/10681/5567/2744/6529/2784/2775/111/2770/2567/108/2550/23710/2555/27165/2556/4905/3763/2571/107/2785/9568/51764/2565/2562/2572/2563/5579/774/2558/2557/140679/2566/5582/57468/2561/2554
hsa05032	Morphine addiction	82	-0.675954	-2.53024	1e-10	1.51818e-09	8.75598e-10	1446	tags=40%, list=9%, signal=37%	408/2784/2775/111/2770/3765/2567/108/2550/2555/2556/5153/3763/5136/107/2785/9568/51764/2565/2562/5138/1812/2563/5579/774/2558/2557/140679/2566/5582/3760/2561/2554
hsa05323	Rheumatoid arthritis	78	0.736848	2.52886	1e-10	1.51818e-09	8.75598e-10	1728	tags=55%, list=10%, signal=50%	6364/6372/7422/6347/2921/3383/2919/3569/3119/6374/3117/3553/1514/6352/10312/3127/3123/3115/3689/3589/7097/2920/3122/3111/245972/3552/3108/3109/54/3113/942/4050/3606/3600/940/51561/2353/941/7040/3725/3118/7043/3683
hsa04610	Complement and coagulation cascades	63	0.759104	2.51469	1e-10	1.51818e-09	8.75598e-10	2157	tags=62%, list=13%, signal=54%	5329/2162/5054/5328/1378/5265/728/7056/715/710/2151/624/716/5104/1675/718/2152/3689/3687/713/717/712/714/3075/3426/5327/3684/11326/730/10544/1191/2/1604/5345/7450/3818/5627/719/5624
hsa05332	Graft-versus-host disease	29	0.863871	2.47497	1e-10	1.51818e-09	8.75598e-10	1853	tags=90%, list=11%, signal=80%	5551/3569/3119/3117/3553/3127/3123/3115/3002/3122/3111/3552/3108/3109/3113/942/3106/355/940/3134/941/3118/3133/3105/3107/356
hsa05330	Allograft rejection	28	0.854351	2.44086	1e-10	1.51818e-09	8.75598e-10	1853	tags=89%, list=11%, signal=80%	5551/3119/3586/3117/3127/3123/3115/3002/3122/3111/3108/3109/3113/942/3106/958/355/940/3134/941/3118/3133/3105/3107/356
hsa05140	Leishmaniasis	69	0.72379	2.4336	1e-10	1.51818e-09	8.75598e-10	1637	tags=57%, list=10%, signal=51%	1378/9103/3119/2212/3586/3117/3553/4688/3127/718/3123/3115/2214/653361/3689/7097/1535/3122/3111/4689/3552/5743/3108/3109/5603/3113/4843/5777/3684/4615/3676/3460/2353/3688/7040/3725/3118/7043/1536
hsa04713	Circadian entrainment	89	-0.630773	-2.40306	1e-10	1.51818e-09	8.75598e-10	2390	tags=49%, list=14%, signal=43%	5594/6261/4842/9252/2786/10681/8863/2892/5567/801/2977/2890/2905/2784/808/5332/2775/111/2770/3765/108/818/816/9722/117/3708/2893/2891/23236/3763/107/5593/2785/51764/8911/2903/116/6262/2904/5579/5582/3760/2902/815
hsa04723	Retrograde endocannabinoid signaling	132	-0.585018	-2.35868	1e-10	1.51818e-09	8.75598e-10	2390	tags=39%, list=14%, signal=33%	5594/2560/773/57406/2166/747/2786/10681/2892/5567/2890/5601/2784/5332/2775/111/2770/5599/5602/3765/2567/108/2555/3708/2556/2915/246213/2893/2891/23236/3763/107/2911/2785/51764/2565/2562/22999/2563/5579/774/57030/57084/2558/2557/140679/2566/5582/3760/2561/2554
hsa04668	TNF signaling pathway	104	0.653215	2.35081	1e-10	1.51818e-09	8.75598e-10	2558	tags=47%, list=15%, signal=40%	6364/3976/6372/4318/9021/6347/2921/602/3383/330/2919/3569/6374/7128/3553/6352/3659/1051/7133/3627/3726/4323/7132/2920/64127/1326/5743/5606/5603/197259/8809/355/3600/841/840/90993/8717/2353/3725/7185/11035/8737/7188/5293/8837/64764/1435/836/4790
hsa04080	Neuroactive ligand-receptor interaction	257	-0.532483	-2.30975	1e-10	1.51818e-09	8.75598e-10	1667	tags=39%, list=10%, signal=36%	2846/8484/1146/2892/1908/5179/2913/130576/2890/2895/2905/5026/3362/66004/1325/7067/2894/147/4987/2917/3351/23620/56923/4828/2898/5737/6863/2567/2550/6866/7068/1910/4160/2555/2914/5746/1394/152/117/2743/1131/10203/2556/1137/4889/1139/6750/7434/1132/1129/150/2915/4923/1141/23566/2893/9340/2891/2912/7433/6869/4985/5646/2911/1135/9568/6755/3350/2565/2903/2562/5733/6752/11255/116/2740/1392/116443/4886…
hsa04145	Phagosome	132	0.622978	2.30703	1e-10	1.51818e-09	8.75598e-10	2536	tags=47%, list=15%, signal=40%	8685/2213/7057/23480/9103/3119/84790/3678/2212/929/9902/715/3117/4481/1514/4688/10312/3127/2204/718/3123/3115/64581/2214/653361/3689/7097/1535/3122/3111/84617/4689/245972/3108/3109/3113/1520/3106/3684/7060/811/60/6890/3134/3688/3118/1536/4973/3133/3105/3107/3673/7058/948/81035/3916/2209/11151/71/3693/7037/29927
hsa04630	JAK-STAT signaling pathway	114	0.631677	2.29188	1e-10	1.51818e-09	8.75598e-10	2465	tags=42%, list=15%, signal=36%	3976/3559/9021/5008/3569/1956/8651/3586/3575/9180/1154/3598/316/5154/50615/3561/3589/3560/3587/3718/1441/3566/8835/1489/1439/5777/5292/3600/1026/3460/3597/3574/51561/6776/11009/5159/85480/6778/3601/3588/5293/2056/3570/5771/6773/3594/163702/6774
hsa05169	Epstein-Barr virus infection	178	0.585311	2.256	1e-10	1.51818e-09	8.75598e-10	3317	tags=48%, list=20%, signal=39%	3383/3569/3119/3117/7128/4616/1647/3127/3123/3115/916/3627/7097/5971/960/965/3718/3122/3111/7431/5606/3108/3109/5603/915/3113/1021/3106/4193/4067/4615/958/917/355/864/3665/1026/841/811/9641/6890/3134/8717/581/4791/3661/3725/3118/695/3133/567/3683/4938/1017/3105/3280/1643/2923/8737/3107/6850/7188/5293/4939/6773/3065/9636/4940/11047/5336/6774/836/4790/4794/919/9020/6892/5714/578/6772/51135/208/4793…
hsa04380	Osteoclast differentiation	118	0.611641	2.22764	1e-10	1.51818e-09	8.75598e-10	2558	tags=50%, list=15%, signal=43%	79168/9021/2213/9103/10288/8651/2212/8061/3553/4982/4688/2214/653361/10859/7305/3726/3554/3937/126014/1535/7132/5971/6688/10326/4689/3552/54/5603/2355/11006/3460/11027/8878/54209/2353/4791/7040/3725/695/3932/6850/7006/55423/799/11024/5293/5468/8792/4772/6773/1436/2209/10990/7042/7048/5336/1435/4773/4790
hsa05152	Tuberculosis	151	0.582021	2.18217	1e-10	1.51818e-09	8.75598e-10	1935	tags=40%, list=12%, signal=35%	2213/1378/9103/7421/3569/3119/2212/929/9902/3586/3117/3553/2207/10312/3127/972/718/3123/1051/3115/64581/2214/3689/1263/3687/3587/7097/1509/7132/3122/3111/64127/245972/3552/3108/3109/5603/3113/4843/1520/3684/4261/4615/3606/841/3656/3460/8717/64170/51561/8877/581/7096/7040/3118/7043/26253/6850/3588/163688
hsa04721	Synaptic vesicle cycle	70	-0.677212	-2.45379	2.19819e-10	3.05915e-09	1.76434e-09	2838	tags=54%, list=17%, signal=45%	155066/163/6540/50617/6570/535/773/6539/528/51606/6571/6512/523/6529/6844/6506/6505/4905/246213/6511/26052/23025/6812/112755/1759/10815/22999/6804/10814/5864/774/440279/57030/57084/140679/6616/6534/6857
hsa04024	cAMP signaling pathway	196	-0.498862	-2.10295	2.13099e-10	3.05915e-09	1.76434e-09	1721	tags=31%, list=10%, signal=28%	268/2892/5567/801/1908/5881/2890/2905/5601/3362/10000/808/3351/111/2770/5599/5727/5602/5058/108/818/2550/816/1258/481/5350/1394/117/486/6750/7434/1129/2893/2891/107/9568/814/11069/6755/478/3350/2903/5733/4878/6752/116/2740/6262/491/1392/116443/4886/1812/7253/2904/7432/492/6751/1128/2902/815
hsa05145	Toxoplasmosis	105	0.619236	2.23025	4.61369e-10	6.16389e-09	3.55497e-09	3317	tags=55%, list=20%, signal=45%	3310/330/3119/8651/3586/3117/3127/240/3123/3115/1234/23643/3587/7097/3912/7132/3122/3111/3915/5606/3108/3109/5603/3113/4843/3910/3908/4261/4615/958/146850/3913/23533/3914/10319/841/3460/3688/7040/3118/7043/5294/3911/3588/959/7042/6774/836/345611/4790/2771/22798/6772/51135/208/4793/7297/3654
hsa04728	Dopaminergic synapse	123	-0.564935	-2.25872	4.8216e-10	6.1939e-09	3.57228e-09	1726	tags=37%, list=10%, signal=33%	6571/2892/5567/801/1644/2890/408/5601/5525/10000/7054/2784/808/5332/2775/111/2770/6323/5599/5602/3765/818/816/3800/5530/3708/5532/3798/2893/2891/23236/3763/2785/2774/51764/2903/5522/1812/2904/5579/774/50632/5582/3760/815
hsa05164	Influenza A	136	0.570634	2.1193	7.14172e-10	8.83458e-09	5.09526e-09	3254	tags=48%, list=19%, signal=39%	9021/6347/3383/3569/3119/3117/3553/6352/3127/3123/3115/3627/7132/3122/3337/3111/3552/3108/3109/3113/1021/834/4261/4615/29108/355/3665/3606/841/60/9641/3460/4600/8717/8795/581/56000/3661/3118/4938/356/5293/4939/6773/51284/4940/71/8743/836/4790/114548/5371/3838/148022/8797/5611/4599/578/29107/91543/6772/51135/208/4793/7297
hsa05321	Inflammatory bowel disease	52	0.725006	2.33928	8.82482e-10	1.05267e-08	6.07121e-09	2666	tags=67%, list=16%, signal=57%	3569/3119/3586/3117/3553/3127/50615/3123/3115/3561/7097/3122/3111/64127/3566/3552/3108/3109/8807/3113/8809/3606/3460/51561/7040/3725/3118/7043/6778/4772/3594/7042/6774/4790/7100
hsa04672	Intestinal immune network for IgA production	37	0.785619	2.36318	1.19047e-09	1.37109e-08	7.90763e-09	2484	tags=76%, list=15%, signal=65%	3569/3119/3586/3117/3127/4055/3123/3115/3122/3111/7852/3108/3109/3113/942/958/3600/3676/940/3695/23308/941/7040/3118/3601/959/10673/2826
hsa05166	Human T-cell leukemia virus 1 infection	206	0.508139	1.98892	3.16197e-09	3.40676e-08	1.96482e-08	2609	tags=33%, list=16%, signal=29%	4316/3559/3383/3569/3119/7850/3117/7538/8061/3127/4055/3123/3115/3561/916/3689/3560/3554/7132/5971/3718/3122/6688/3111/3108/3109/915/3113/3106/958/917/1958/8829/3600/1026/811/3134/90993/920/6776/2353/581/4791/706/7040/3725/3118/7043/3932/3133/567/9232/3683/1017/3105/3107/3601/5293/1959/1031/6513/991/4772/64764/7042/7048/4773/4790/9133
hsa04020	Calcium signaling pathway	214	-0.465893	-1.97947	3.0909e-09	3.40676e-08	1.96482e-08	1478	tags=28%, list=9%, signal=26%	2668/2905/5026/3362/27006/808/5332/147/4915/6547/2253/5737/2066/108/5534/818/816/1910/57118/5350/5530/845/3708/1131/2254/5532/952/1139/8822/1129/2915/4923/5153/23236/6869/3706/5136/107/2911/814/2774/777/8911/2903/57172/5733/6262/491/1812/887/5579/774/492/3356/3361/1128/6543/5582/2902/815
hsa04657	IL-17 signaling pathway	73	0.655682	2.225	3.82734e-09	3.99478e-08	2.30396e-08	2558	tags=42%, list=15%, signal=36%	6364/6372/4318/6347/6280/6279/2921/2919/3569/6374/225689/7128/8061/3553/1051/3627/2920/5743/5603/841/9641/8717/84818/2353/3725/27190/7188/7184/23765/836/4790
hsa05322	Systemic lupus erythematosus	44	0.740126	2.30484	4.18994e-09	4.24073e-08	2.4458e-08	2326	tags=73%, list=14%, signal=63%	3119/2212/3586/715/3117/716/3127/718/3123/3115/2214/87/713/717/712/3122/714/3111/3108/3109/3113/942/958/730/940/6737/941/3118/81/1991/959/2209
hsa04621	NOD-like receptor signaling pathway	149	0.551449	2.06698	6.11463e-09	6.00672e-08	3.46433e-08	3256	tags=42%, list=19%, signal=34%	6347/10135/2921/330/2919/3569/837/7128/114769/2633/3553/6352/115362/1508/79792/440738/1535/2920/7205/64127/2634/5603/834/4615/29108/3665/838/3606/841/9641/51393/64170/3661/3725/5330/1536/58484/4938/11035/8737/118429/3710/7188/4939/10392/84674/6773/3428/2635/4940/4671/4790/114548/5580/148022/4210/10616/115361/6772/51135/4793/7297/22900
hsa05320	Autoimmune thyroid disease	30	0.796882	2.30116	6.67554e-09	6.37037e-08	3.67406e-08	2276	tags=90%, list=14%, signal=78%	5551/3119/3586/3117/3127/3123/3115/3002/3122/3111/3108/3109/3113/942/3106/958/355/940/3134/941/3118/3133/3105/3107/356/959/1493
hsa04064	NF-kappa B signaling pathway	95	0.609369	2.1517	7.14182e-09	6.62602e-08	3.8215e-08	3637	tags=53%, list=22%, signal=41%	597/5328/2921/3383/330/2919/929/8740/7128/3553/4616/1647/4055/23643/3554/7132/5971/2920/5743/4067/4050/4615/958/8717/7535/4791/695/3932/7185/8737/6850/7188/8792/60401/8837/959/10673/5336/128178/4790/9020/148022/84433/8915/51135/3654/598/27040/4792/29760
hsa05416	Viral myocarditis	55	0.695191	2.25742	7.60809e-09	6.86784e-08	3.96097e-08	1817	tags=55%, list=11%, signal=49%	5551/3383/3119/3117/5880/3127/3123/3115/3689/3122/3111/3108/3109/3113/942/3106/3908/958/841/60/940/857/3134/941/3118/3133/3683/3105/1604/3107
hsa04911	Insulin secretion	74	-0.631023	-2.31455	9.58254e-09	8.42255e-08	4.85763e-08	1449	tags=42%, list=9%, signal=38%	5567/6833/5332/6844/111/108/818/816/3767/481/3782/117/1131/486/23236/107/27445/3780/11069/478/9699/116/2740/6262/6804/5579/5864/5582/6616/885/815
hsa04510	Focal adhesion	191	0.504058	1.96003	1.23545e-08	1.05805e-07	6.10221e-08	2476	tags=36%, list=15%, signal=31%	3381/7422/7057/330/6696/3678/1956/2335/1293/10451/3371/1282/1284/1292/3675/2318/5154/5880/10627/7791/10398/1299/87/7408/3912/2316/1291/6464/3915/7148/3672/64098/1277/3910/3908/7060/3679/3913/3914/10319/60/3676/3695/857/4233/7409/3688/5159/3725/2064/81/29780/3673/3911/7058/7450/5293/80310/858/22801/1278/5908/3691/3696/71/5829/3693/2324
hsa04659	Th17 cell differentiation	96	0.60515	2.1456	1.50362e-08	1.25552e-07	7.24111e-08	3687	tags=59%, list=22%, signal=47%	3559/3569/3556/3119/3117/3553/3127/861/50615/3123/3115/3561/916/3560/3554/3718/3122/3111/3566/3108/3109/5603/915/3113/917/3460/920/196/7535/51561/6776/2353/7040/3725/3118/3932/6778/3570/4772/246778/3594/7048/6774/4773/4790/4794/919/2625/6772/4793/7297/9466/10148/27040/4792/30009/50943
hsa04720	Long-term potentiation	63	-0.645256	-2.29087	2.32525e-08	1.89423e-07	1.09248e-07	1631	tags=41%, list=10%, signal=37%	5567/801/2890/2905/808/5332/27330/5534/818/816/5530/3708/5532/2915/2891/23236/107/5502/2911/814/2903/2904/5579/5582/2902/815
hsa05202	Transcriptional misregulation in cancer	155	0.525295	1.97845	2.44363e-08	1.94327e-07	1.12076e-07	2672	tags=36%, list=16%, signal=31%	4318/3486/597/5328/330/3569/929/7850/64332/4804/4616/1647/5154/861/1051/3002/3560/51384/6688/1848/6692/8091/942/4193/5327/26471/3684/958/1026/51513/1649/3695/4233/4211/581/3206/54738/7185/860/4005/1643/7849/2120/5468/171558/1050/1031/1991/3065/1436/2209/7048/3728/4790/5371/4066
hsa04512	ECM-receptor interaction	79	0.632472	2.17545	2.99193e-08	2.32396e-07	1.34033e-07	2442	tags=54%, list=15%, signal=47%	3381/7057/6696/3678/2335/1293/3371/1282/1284/1292/3675/255743/1299/341640/3912/960/1291/3915/7148/3672/1277/3910/3339/3908/7060/3679/3913/3914/10319/3676/3695/6385/3688/3673/3911/7058/7450/948/22801/1278/3691/3696/3693
hsa04925	Aldosterone synthesis and secretion	89	-0.572069	-2.17942	5.27102e-08	4.00118e-07	2.30765e-07	1631	tags=31%, list=10%, signal=29%	5567/801/808/5332/111/108/818/816/51305/57118/481/6770/3708/23236/5581/107/3777/814/478/8911/57172/4878/491/5138/5579/492/5582/815
hsa05133	Pertussis	70	0.640717	2.16143	8.40889e-08	6.12954e-07	3.53516e-07	2579	tags=53%, list=15%, signal=45%	6372/3569/3678/6374/929/3586/715/710/3553/716/3659/718/3689/23643/713/717/712/714/3552/5603/4843/834/3684/4615/29108/840/51561/2353/3688/3661/3725/163688/10392/725/836/4790/114548
hsa04151	PI3K-Akt signaling pathway	302	0.439184	1.78892	8.44188e-08	6.12954e-07	3.53516e-07	3060	tags=35%, list=18%, signal=29%	3381/7422/3559/7057/5008/3569/6696/3678/1956/2335/1293/3575/9180/3371/1282/1284/1292/3675/4804/5154/1299/3561/3560/7097/3912/3718/285/1291/3915/1441/3566/7148/3672/1277/2261/1021/4193/3910/3908/146850/7060/3679/3913/23533/3914/10319/1026/3676/3695/4233/2997/118788/90993/2252/2793/3574/3688/1978/55970/5159/1969/5294/2064/1017/10161/2787/356/3673/6850/3911/7058/7450/5293/80310/2323/2056/22801/3570/…
hsa05310	Asthma	20	0.838638	2.20155	1.05159e-07	7.47301e-07	4.30999e-07	1657	tags=80%, list=10%, signal=72%	3119/3586/3117/2207/3127/3123/3115/3122/3111/3108/3109/3113/6037/958/3118/2205
hsa04742	Taste transduction	52	-0.653762	-2.22674	2.31915e-07	1.61374e-06	9.30713e-07	1747	tags=46%, list=10%, signal=41%	50832/5567/2784/5332/3351/2550/6328/2555/2914/1131/2556/5153/23236/5136/2911/9568/51764/40/3350/6326/255022/2558/2557/2554
hsa04612	Antigen processing and presentation	56	0.663992	2.16928	3.15437e-07	2.15012e-06	1.24006e-06	2111	tags=59%, list=13%, signal=52%	3310/3119/10437/3117/1514/3127/972/1508/3123/3115/3122/3111/3108/3109/3113/1520/3106/4261/926/3309/811/6890/3134/920/925/3118/3133/567/3105/2923/3107/5721/5641
hsa05165	Human papillomavirus infection	295	0.431038	1.75034	4.2824e-07	2.86064e-06	1.64985e-06	3423	tags=36%, list=20%, signal=29%	3381/7422/7057/6696/3678/1956/2335/1293/3371/1282/1284/1292/3675/3659/10312/1299/51384/3912/7132/1291/3915/7148/3672/245972/1277/5743/1021/3106/4193/3910/3908/7060/3679/355/8324/3913/3914/10319/1026/841/5734/3676/3695/9641/3134/26508/90993/8638/4600/8717/7855/3688/1978/581/5159/3661/54626/6932/3133/8323/1017/3105/3280/5315/3107/4854/356/3673/3911/8321/7058/7450/5293/22801/1278/6773/3065/9636/6476…
hsa04725	Cholinergic synapse	104	-0.522703	-2.03838	4.54553e-07	2.97688e-06	1.71689e-06	2390	tags=38%, list=14%, signal=33%	5594/5295/773/3845/3785/2786/10681/1136/5567/10000/2784/5332/2775/3786/111/2770/108/818/816/3708/1131/1137/1139/1132/1129/1141/23236/3763/107/2785/814/51764/56479/5579/3761/774/1128/5582/3760/815
hsa05134	Legionellosis	51	0.673968	2.17038	4.87689e-07	3.13246e-06	1.80662e-06	1685	tags=39%, list=10%, signal=35%	3310/1378/2921/2919/3569/929/3553/718/3689/7097/2920/834/3684/4615/29108/3606/841/840/4791/58484
hsa05417	Lipid and atherosclerosis	184	0.47627	1.84274	7.33629e-07	4.62325e-06	2.66642e-06	2579	tags=35%, list=15%, signal=30%	4318/3310/6347/6648/2921/3383/2919/3569/929/10451/3553/6352/4688/653361/23643/7097/1535/7132/2920/4689/5606/5603/834/4067/4615/958/29108/355/3665/3606/3309/841/1649/840/9641/5452/7409/8795/2353/581/3661/3725/5330/1536/338/4973/839/7494/356/163688/5293/948/5468/2081/4772/9138/7184/5908/959/8743/6774/836/4773/4790/114548
hsa04261	Adrenergic signaling in cardiomyocytes	141	-0.470525	-1.90435	8.00436e-07	4.95084e-06	2.85536e-06	1664	tags=28%, list=10%, signal=26%	784/5567/801/6330/782/5525/10000/808/5332/147/70/6547/111/2770/108/818/816/481/5350/59283/783/785/486/23236/781/107/5502/9254/11069/7139/478/55799/10369/5522/6262/491/492/6543/10368/815
hsa05162	Measles	116	0.539131	1.95911	8.46949e-07	5.14329e-06	2.96635e-06	3317	tags=43%, list=20%, signal=35%	3310/3559/2213/3569/7128/4478/3553/3561/916/3560/7097/3718/3552/915/1021/4615/917/355/3665/841/940/9641/4600/8717/6776/2353/581/3661/3725/4938/1017/6504/356/5293/4939/6773/51284/4940/6774/836/4790/4599/578/27113/6772/51135/208/4793/7297/3654
hsa05340	Primary immunodeficiency	30	0.744324	2.14939	9.5754e-07	5.71104e-06	3.29379e-06	2253	tags=63%, list=13%, signal=55%	3575/3561/916/3718/915/973/4261/958/926/5788/6890/920/925/7535/695/3932/326/84876/959
hsa04921	Oxytocin signaling pathway	141	-0.466627	-1.88858	1.2037e-06	7.05327e-06	4.06791e-06	1664	tags=30%, list=10%, signal=27%	784/5567/801/2977/782/808/5332/2775/111/2770/4208/3765/108/5534/818/816/57118/5530/10645/59283/783/785/3708/5532/952/23236/3763/781/107/9254/814/55799/10369/57172/4878/6262/5579/3761/5582/3760/10368/815
hsa05146	Amoebiasis	83	0.578892	2.00558	2.71267e-06	1.53565e-05	8.85671e-06	2885	tags=54%, list=17%, signal=45%	2921/2919/3569/2335/3315/929/3586/7850/3553/1282/1284/1281/87/3689/3554/7097/3912/2920/2769/3915/1277/4843/3910/3908/3684/3913/3914/10319/911/5269/7040/7043/5330/81/3911/5293/1278/383/7042/913/836/4790/1285/5272/912
hsa04142	Lysosome	122	0.519766	1.90232	2.66905e-06	1.53565e-05	8.85671e-06	4524	tags=48%, list=27%, signal=36%	6556/1522/1514/10312/1075/1508/1509/967/7805/245972/10577/54/1520/2519/2990/3074/27074/9516/5476/2799/2517/4125/2717/285362/4668/2588/8692/5641/1200/2720/3916/22901/410/3073/8763/130340/1513/23659/2548/6448/1777/533/4126/57192/9179/1521/6609/53/4669/2760/527/4758/8905/175/3482/9741/8546/1203/138050
hsa05031	Amphetamine addiction	63	-0.593439	-2.1069	2.90595e-06	1.61765e-05	9.32964e-06	1726	tags=43%, list=10%, signal=39%	6571/2892/5567/801/1644/2890/2905/7054/808/111/5534/818/816/5530/5532/2893/2891/814/2903/116443/1812/6804/2904/5579/5582/2902/815
hsa05418	Fluid shear stress and atherosclerosis	125	0.506178	1.85652	3.73292e-06	2.04393e-05	1.17882e-05	2565	tags=34%, list=15%, signal=29%	7422/4318/3162/6347/3383/7056/7850/3553/1514/4688/5154/5880/653361/1843/3554/1535/7132/3552/4313/5603/1728/5327/60/4258/6385/857/8878/2353/3725/2949/6383/163688/5293/387082/858/59341/1003/7184/71/445/4790/2817
hsa04613	Neutrophil extracellular trap formation	98	0.543761	1.9314	3.85275e-06	2.07551e-05	1.19703e-05	2558	tags=40%, list=15%, signal=34%	366/2358/1378/728/837/2212/2357/4688/5880/718/27180/2359/79792/64581/2214/653361/3689/7097/1535/51311/4689/5603/834/3684/60/51564/5330/1536/3683/6850/7450/5293/1991/3065/2209/51284/71/5336/4790
hsa04940	Type I diabetes mellitus	34	0.714901	2.12903	4.16524e-06	2.20824e-05	1.27358e-05	1853	tags=74%, list=11%, signal=66%	5551/3119/3117/3553/3127/3123/3115/3002/3122/3111/3552/3108/3109/3113/942/3106/355/940/3134/941/3118/3133/3105/3107/356
hsa04670	Leukocyte transendothelial migration	95	0.541804	1.91313	6.35604e-06	3.31706e-05	1.91308e-05	2454	tags=40%, list=15%, signal=34%	4318/3383/4478/399/10451/4688/5880/10627/10398/1366/653361/87/3689/7408/1535/4689/7852/3702/4313/9076/5603/3684/60/3676/6494/7409/83593/3688/1536/3683/81/5293/1003/5908/90952/71/5829/5336
hsa05167	Kaposi sarcoma-associated herpesvirus infection	168	0.470353	1.79192	7.39157e-06	3.79813e-05	2.19054e-05	3167	tags=40%, list=19%, signal=33%	7422/2921/3383/2919/3569/7538/718/1234/9976/440738/7132/2920/285/1230/1233/5743/1827/5603/1021/942/3106/4067/146850/355/3055/3665/23533/1026/841/100507436/9641/3134/51176/8717/2793/2353/581/55970/3661/3725/6932/3133/5294/3105/2787/3107/3710/6850/163688/5293/4277/4772/6773/131450/5336/6774/836/4773/4790/2783/94235/148022/5155/578/3265/9261/6772/208
hsa05135	Yersinia infection	130	0.499459	1.83982	8.12507e-06	4.11178e-05	2.37143e-05	3564	tags=44%, list=21%, signal=35%	6347/3569/3678/2335/2212/3586/10451/3553/5880/3937/10095/7454/5606/5603/834/4615/926/29108/3606/60/3676/6195/920/925/7409/7535/2353/3688/3661/3725/391/3932/58484/5293/644150/4772/9138/10093/71/5829/382/4773/4790/114548/148022/4210/8935/10109/51135/208/3654/10092/10552/27040/7456/4792/10094
hsa05171	Coronavirus disease - COVID-19	187	0.442953	1.71612	8.47002e-06	4.22237e-05	2.43521e-05	3384	tags=30%, list=20%, signal=25%	6347/2162/728/3569/1956/2212/715/3553/716/1675/718/3627/713/717/7097/7132/712/714/51311/5603/834/4615/730/8829/1839/9641/4600/2353/3661/3725/1536/4938/185/6850/7450/5293/4939/3570/719/6773/9636/51284/4940/5336/6774/4790/114548/6158/4599/6231/6772/51135/4793/7297/3654/51065/7098
hsa05222	Small cell lung cancer	90	0.538327	1.88624	9.58895e-06	4.70987e-05	2.71638e-05	2017	tags=30%, list=12%, signal=27%	330/2335/1282/1284/3675/4616/1647/3912/3915/5743/1021/4843/3910/3908/3913/3914/10319/1026/3688/581/7185/1017/1643/3673/3911/7188/5293
hsa05144	Malaria	40	0.661896	2.02628	1.32736e-05	6.4252e-05	3.70568e-05	2339	tags=62%, list=14%, signal=54%	6347/1378/7057/3383/3569/3586/3553/3689/7097/4615/958/7060/3606/4233/2995/7040/7043/3683/6383/7058/4035/948/3820/959/7042
hsa04062	Chemokine signaling pathway	164	0.461276	1.75305	1.41596e-05	6.75616e-05	3.89655e-05	2741	tags=34%, list=16%, signal=29%	6364/6372/6347/2921/2919/6374/5473/6355/10451/6352/5880/10563/4283/1234/2268/653361/3627/2920/3718/729230/6464/1230/7852/7454/6373/1233/3702/4067/146850/3055/23533/58191/10663/7409/2833/2793/55970/5330/9547/1794/5294/2787/3579/5293/6773/5908/5829/5336/6774/2826/3577/4790/2783/1236/94235/5580
hsa04726	Serotonergic synapse	96	-0.488503	-1.87015	1.71123e-05	8.01484e-05	4.62249e-05	2867	tags=43%, list=17%, signal=36%	5578/242/775/3781/5604/7220/246/5594/2560/6570/773/3845/2786/10681/6571/5567/1644/3362/2784/5332/2775/3351/111/2770/3765/3708/260293/23236/3763/2785/51764/3350/2562/3751/5579/774/3356/3361/5582/3760/2561
hsa05203	Viral carcinogenesis	154	0.463277	1.74135	1.72775e-05	8.01484e-05	4.62249e-05	3076	tags=32%, list=18%, signal=27%	4055/718/1234/87/3718/85477/245972/6672/1233/1021/3106/4193/4067/3665/1026/841/3134/90993/8717/51564/6776/581/4791/3661/3725/3133/81/7185/1017/3105/5315/3107/6850/7188/5293/1959/991/3065/64764/5829/6774/836/4790/2961/9586/2934/578/3265/9261/1111
hsa05205	Proteoglycans in cancer	189	0.442345	1.7172	2.01189e-05	9.20507e-05	5.30895e-05	2578	tags=34%, list=15%, signal=29%	7422/4318/3236/5329/5328/7057/3678/1956/2335/4478/10451/1514/2318/4060/51384/7097/967/960/2316/6237/1277/4313/5603/5777/8826/4193/3339/7291/3059/355/8324/1026/60/1839/6385/857/4233/7409/7855/3688/1634/7040/8323/2064/6383/3710/356/3673/8321/5293/858/1278/9138/2260/7042/71/5829/8325/3693/5336/6774/836/2817/6548
hsa04970	Salivary secretion	69	-0.528475	-1.91644	3.5574e-05	0.000159288	9.1868e-05	2867	tags=48%, list=17%, signal=40%	5578/727897/148/480/4025/153/3778/4842/490/5567/801/2977/808/5332/147/6844/111/108/481/3708/1131/486/952/55503/23236/107/5593/478/491/653247/5579/492/5582
hsa05132	Salmonella infection	237	0.417413	1.6581	3.57683e-05	0.000159288	9.1868e-05	3400	tags=34%, list=20%, signal=28%	330/3569/84790/302/837/929/399/3553/2318/10627/10398/79792/23643/7097/7132/2316/6237/84617/57381/10095/6281/5606/5603/834/197259/27128/4615/29108/838/3606/5788/841/60/5216/840/29109/51176/8717/8795/2353/581/3071/3725/391/58484/6932/5294/11035/8737/2597/5420/5293/10392/7184/10093/51429/71/382/8743/4671/836/4790/114548/79443/7100/9266/10333/8797/578/10109/6990/3265/51135/208/113146/103910/83547/365…
hsa05017	Spinocerebellar ataxia	128	-0.44205	-1.78587	3.72999e-05	0.000163923	9.45414e-05	3020	tags=33%, list=18%, signal=27%	10105/8408/55102/25814/291/23369/4976/7417/3516/5578/4217/5291/6261/5295/773/3752/9821/9519/7222/2892/2259/2890/2905/5601/10000/3748/5332/5599/5602/5649/3708/6511/2891/23236/6712/2911/2903/116443/2904/5579/5582/2902
hsa04620	Toll-like receptor signaling pathway	84	0.54099	1.87251	3.8407e-05	0.000166597	9.60832e-05	3384	tags=46%, list=20%, signal=37%	3569/6696/929/3553/6352/4283/3627/23643/7097/51311/1326/6373/5606/5603/942/4615/958/3665/841/9641/2353/941/7096/3661/3725/8737/3663/5293/51284/4790/1513/7100/10333/148022/6772/51135/208/3654/7098
hsa05200	Pathways in cancer	473	0.35107	1.48424	4.4128e-05	0.000188958	0.00010898	3167	tags=31%, list=19%, signal=26%	7422/4318/3559/3162/330/3569/1956/2335/3575/624/1282/1284/3675/4616/1647/5154/5880/861/3561/3560/51384/3912/3718/6688/3915/1441/7852/3566/5743/4313/2261/1021/4843/1439/4193/3910/1728/3908/5292/355/8324/3913/3914/10319/3600/1026/841/840/5734/4258/4233/3460/26508/51176/3597/2252/2793/3574/7855/51561/6776/83593/2353/3688/581/4791/55970/5159/7040/3725/7043/5330/6932/8323/2949/2064/7185/1017/10161/328…
hsa04972	Pancreatic secretion	77	-0.516095	-1.90666	4.62246e-05	0.000195431	0.000112713	1337	tags=27%, list=8%, signal=25%	51032/63036/5332/111/5874/108/481/3708/1131/486/952/23236/107/5646/478/6262/491/5579/492/5582/885
hsa04971	Gastric acid secretion	69	-0.519056	-1.88229	6.43135e-05	0.000268509	0.00015486	1697	tags=33%, list=10%, signal=30%	495/5567/801/808/5332/3776/111/2770/108/818/816/481/3708/1131/6750/23236/107/478/6752/887/5579/5582/815
hsa04210	Apoptosis	128	0.472094	1.73095	7.07842e-05	0.000291876	0.000168337	3167	tags=39%, list=19%, signal=32%	597/5551/330/84790/1522/1514/4616/1647/1075/1508/3002/1509/7132/1439/1520/4000/355/841/1649/60/840/8717/8795/2353/581/3725/7185/8737/839/3710/356/5293/2081/8837/71/8743/836/4790/332/1513/9020/8797/578/4001/843/27113/3265/4914/835/208
hsa04740	Olfactory transduction	46	-0.589138	-1.9595	7.39246e-05	0.000301107	0.000173661	1862	tags=43%, list=11%, signal=39%	343171/5567/801/408/808/6547/83988/284521/818/816/1258/5153/5136/5593/2774/51764/390429/5138/6543/815
hsa04260	Cardiac muscle contraction	77	-0.505356	-1.86699	8.99797e-05	0.000360677	0.000208017	1664	tags=26%, list=10%, signal=24%	784/782/70/6547/10479/481/845/59283/783/785/486/781/9254/7139/478/55799/10369/6262/6543/10368
hsa05131	Shigellosis	209	0.421268	1.65348	9.07091e-05	0.000360677	0.000208017	3229	tags=33%, list=19%, signal=27%	3678/1956/3101/837/929/3553/6352/10627/10398/718/87/440738/3554/7132/960/10095/3099/5603/55062/834/4193/27128/3059/4615/29108/3606/60/5216/8878/8717/92610/3688/581/3661/3725/831/5330/58484/81/8737/10318/3710/7188/5293/10392/10093/71/5829/382/5336/4671/4790/114548/199746/7100/9266/5580/84335/826/3611/7094/10616/2308/10109/8915/208/5333/4793/103910
hsa04933	AGE-RAGE signaling pathway in diabetic complications	97	0.503393	1.78496	0.00012717	0.000499702	0.000288199	3189	tags=44%, list=19%, signal=36%	7422/6347/5054/3383/7056/3569/2335/3553/1282/1284/2152/1281/50507/3552/1277/4313/5603/5292/1958/6776/581/7040/3725/7043/5330/1536/185/5293/1278/4772/7042/7048/5336/6774/836/4790/1285/5580/2308/3265/6772/208/5333
hsa04730	Long-term depression	55	-0.548213	-1.8877	0.000135039	0.000524455	0.000302475	2629	tags=42%, list=16%, signal=35%	5604/3480/5594/6261/773/3845/4842/2892/2977/2890/2895/5332/2775/2770/1394/3708/2891/23236/2911/5593/1392/5579/5582
hsa04514	Cell adhesion molecules	131	0.457613	1.68628	0.000146865	0.000563828	0.000325183	2411	tags=42%, list=14%, signal=36%	3383/3119/3117/3127/3123/3115/29126/1366/80380/3689/914/965/3122/3111/5133/3108/3109/9076/3113/942/3106/3684/80381/958/926/10666/5788/3676/940/3695/6385/3134/1002/920/925/23308/3688/941/6693/3118/3133/3683/3105/6383/3107/6614/923/201633/5817/1003/959/90952/1493/3696/947
hsa05130	Pathogenic Escherichia coli infection	177	0.427485	1.64639	0.000161191	0.000611793	0.000352846	3644	tags=40%, list=22%, signal=32%	3569/84790/837/2212/64005/3553/1366/3554/7132/84617/10095/4542/9076/5603/834/5777/27128/3059/4615/29108/355/3606/4627/841/60/840/8717/4430/8795/9871/2353/3688/581/4641/3071/3725/8737/2597/356/4643/644150/9138/4645/10093/71/382/8743/4671/836/4790/114548/7100/9266/8797/55930/2768/578/10109/51135/2149/4793/5010/3654/10092/10552/7456/4642/4792/10094/9071/57121
hsa04115	p53 signaling pathway	69	0.546383	1.8371	0.000198077	0.000743345	0.000428718	3076	tags=42%, list=18%, signal=34%	3486/5054/55240/7057/2810/4616/1647/1021/4193/355/1026/841/8795/581/1017/1643/6241/51246/891/83667/84883/836/9133/9540/8797/11200/51512/27113/1111
hsa04961	Endocrine and other factor-regulated calcium reabsorption	47	-0.561789	-1.87342	0.000202349	0.000750941	0.000433099	1631	tags=34%, list=10%, signal=31%	490/5567/5332/6547/481/486/23236/793/26052/478/1759/491/5579/492/6543/5582
hsa05142	Chagas disease	92	0.492658	1.73289	0.000293255	0.00107634	0.000620771	2796	tags=41%, list=17%, signal=35%	6347/5054/3569/3586/3553/624/6352/718/916/713/7097/7132/712/714/2769/5603/915/4843/4615/917/355/841/811/3460/2353/7040/3725/7043/5330/356/5293/8837/7042/7048/4790/919/10333/148022
hsa00380	Tryptophan metabolism	36	0.632482	1.89472	0.000304025	0.00110374	0.000636574	1030	tags=25%, list=6%, signal=24%	6999/11185/259307/3620/8942/316/4129/1545/8564
hsa00520	Amino sugar and nucleotide sugar metabolism	44	0.587612	1.82989	0.000316278	0.00113588	0.000655109	4875	tags=61%, list=29%, signal=44%	3101/3099/3074/9945/5973/2645/80896/91373/1118/5373/6675/3073/2821/51700/51706/55276/54187/140838/51005/2582/5236/2762/55577/8790/29926/2584/10007
hsa04658	Th1 and Th2 cell differentiation	81	0.512289	1.78072	0.00032293	0.00114743	0.000661772	3669	tags=56%, list=22%, signal=44%	3559/3119/3117/3127/3123/3115/3561/916/3560/3718/3122/3111/3566/3108/3109/5603/915/3113/917/864/3460/920/7535/6776/2353/3725/3118/3932/54567/6778/4854/4772/3594/4773/4790/4794/919/2625/6772/4793/7297/27040/4792/30009/4094
hsa04662	B cell receptor signaling pathway	74	0.517137	1.7543	0.000337114	0.00117288	0.000676446	3205	tags=49%, list=19%, signal=40%	79168/2213/10288/10451/5880/971/10859/5777/973/4067/8519/11006/3635/118788/11027/7409/27071/2353/3725/695/6850/11024/5293/974/4772/10990/5336/4773/4790/4794/84433/3265/8915/975/208/4793
hsa04936	Alcoholic liver disease	117	0.460754	1.67596	0.000335635	0.00117288	0.000676446	3317	tags=36%, list=20%, signal=29%	2921/728/2919/3569/929/3553/718/23643/713/717/50507/7132/2920/712/714/5606/5603/4615/355/64900/841/9641/51176/8717/84818/3661/6932/8737/356/719/23765/836/4790/9020/148022/2308/130/37/51135/208/6720/3654
hsa04974	Protein digestion and absorption	85	0.504235	1.75765	0.000367291	0.00126469	0.000729401	2300	tags=41%, list=14%, signal=36%	1803/1295/117247/1293/1289/1282/1284/1292/50509/1299/1307/8645/1281/10008/1303/169044/1291/1290/1277/91522/9056/3783/85301/80781/1305/1296/340267/2006/6510/84570/1306/3784/1300/1278/23428
hsa04929	GnRH secretion	60	-0.520938	-1.84145	0.00038769	0.00132131	0.000762054	2867	tags=48%, list=17%, signal=40%	5578/775/3781/5604/7220/5291/5594/5295/3845/610/57657/408/10000/5332/3765/2550/3767/3782/3708/7224/23236/3763/3780/9568/8911/5579/5582/3760/348980
hsa04360	Axon guidance	177	-0.379425	-1.57544	0.000470596	0.00158767	0.000915673	2569	tags=31%, list=15%, signal=27%	658/7220/5291/54437/5594/5295/659/3845/55740/1949/3983/50855/9901/57689/7222/137970/22885/5881/57715/64218/81029/56920/2046/9353/2044/2770/6586/5727/5058/5534/818/816/84628/27289/64101/5530/10501/151449/2047/3897/5590/7224/5532/56924/6585/2045/5063/223117/84448/285220/59277/90249/2051/25791/815
hsa05030	Cocaine addiction	46	-0.544465	-1.81092	0.000588769	0.00196649	0.00113415	1726	tags=39%, list=10%, signal=35%	6571/5567/2913/1644/2905/1742/7054/111/2770/8787/2891/2912/8851/2903/116443/1812/2904/2902
hsa05034	Alcoholism	100	-0.433467	-1.66218	0.000617538	0.00204216	0.0011778	2390	tags=32%, list=14%, signal=28%	5594/6570/3845/10014/2786/10681/6571/5567/801/1644/2905/7054/2784/808/2775/9759/4915/5569/111/2770/53358/10645/2785/814/51764/2903/84254/1392/116443/1812/2904/2902
hsa03250	Viral life cycle - HIV-1	61	0.532333	1.75679	0.000741428	0.00242781	0.00140022	2955	tags=30%, list=18%, signal=24%	200315/60489/27350/1234/140564/7852/684/200316/920/4600/5045/9582/85363/164668/22936/25939/636/4599
hsa04022	cGMP-PKG signaling pathway	149	-0.382062	-1.56771	0.000751686	0.00243751	0.00140581	1623	tags=22%, list=10%, signal=20%	801/2977/10000/808/5332/147/6547/111/2770/4208/108/5534/1258/1910/481/5350/5530/152/3708/486/5532/150/23236/4985/5581/107/5593/478/4878/491/5138/492/6543
hsa04916	Melanogenesis	92	-0.437165	-1.66753	0.000836475	0.00268637	0.00154934	2867	tags=35%, list=17%, signal=29%	5578/7482/5604/7483/5594/3845/6934/7481/3815/7473/83439/5567/801/7306/81029/808/5332/2775/111/2770/108/818/816/1638/1910/23236/107/7472/7480/5579/5582/815
hsa00500	Starch and sucrose metabolism	26	0.669846	1.8737	0.000913684	0.00290639	0.00167623	4088	tags=58%, list=24%, signal=44%	3101/5836/3099/8972/2632/2997/2645/8908/2821/2548/5837/55276/92579/5167/5236
hsa00052	Galactose metabolism	24	0.668747	1.83399	0.00113607	0.00357971	0.00206456	4088	tags=62%, list=24%, signal=47%	3101/3099/130589/8972/2683/2645/57016/2717/2720/2548/55276/5211/2582/92579/5236
hsa05168	Herpes simplex virus 1 infection	453	0.330614	1.3948	0.0011843	0.00369678	0.00213209	5229	tags=35%, list=31%, signal=25%	9021/6347/330/3569/3119/3678/3117/8740/3553/6352/3127/972/718/3123/3115/8764/7097/7132/3122/3111/6672/3108/3109/684/3113/3106/4615/355/3665/29992/841/811/162966/9641/3460/6890/3134/5452/8717/64170/1978/581/29990/56000/3661/3118/3133/567/4938/3105/2923/3107/356/6850/7188/388559/90333/5293/4939/6773/25888/4940/10520/836/4790/5371/148022/348327/388561/6892/55762/125893/578/91661/5199/5499/6772/55769…
hsa04625	C-type lectin receptor signaling pathway	93	0.465756	1.63922	0.00121797	0.0037667	0.00217241	3167	tags=43%, list=19%, signal=35%	602/3569/3586/3553/2207/3659/64581/1263/5971/6237/5743/5603/834/4193/29108/841/9641/64170/51561/4791/3725/26253/3710/6850/163688/5293/1959/4772/6773/5336/4773/4790/114548/5580/9020/3265/9261/8915/6772/208
hsa04216	Ferroptosis	40	0.57665	1.76531	0.00127764	0.00391497	0.00225792	1794	tags=30%, list=11%, signal=27%	3162/55240/2512/440738/1356/6303/64116/2495/2180/23516/1536/2730
hsa00650	Butanoate metabolism	23	-0.65803	-1.87726	0.00132356	0.00401881	0.00231781	2397	tags=43%, list=14%, signal=37%	39/79944/18/65985/5019/3157/7915/2571/54511/2572
hsa05219	Bladder cancer	39	0.578691	1.76315	0.00140153	0.00421721	0.00243224	1220	tags=26%, list=7%, signal=24%	7422/4318/7057/1956/1890/4313/2261/4193/1026/1839
hsa04218	Cellular senescence	144	0.410233	1.53413	0.0019389	0.00578208	0.00333477	3167	tags=33%, list=19%, signal=27%	3486/5054/3569/4616/1647/6237/3552/5606/5603/1021/3106/4193/4605/1026/3134/8878/83593/1978/7040/7043/678/3133/1017/3105/3107/3710/163688/5293/891/59341/4772/7042/7048/4773/677/4790/9133/3364/11200/2308/993/3265/9261/5499/1111/10758/208
hsa05206	MicroRNAs in cancer	164	0.400075	1.52046	0.00198719	0.00587363	0.00338756	3423	tags=33%, list=20%, signal=26%	7422/4318/3236/3162/5328/7057/3678/1956/8651/3371/6768/5154/960/6464/7431/7148/5743/2261/8091/1021/4193/1545/5292/407008/1026/406937/4233/10253/5159/2064/4854/5293/9493/3065/1945/7042/5336/6774/836/8626/4363/4790/406891/11186/5155/993/578/3265/7168/10298/994/6624/1942/4855
hsa04070	Phosphatidylinositol signaling system	88	-0.426224	-1.61713	0.00220081	0.00644799	0.00371882	3917	tags=40%, list=23%, signal=31%	3631/160851/805/3705/200576/8898/5728/8525/8821/5578/8776/5291/3628/5295/8760/8396/253430/3632/1040/801/808/5332/8867/22876/5297/9108/8395/9162/3708/8526/23236/3706/1607/5579/5582
hsa04924	Renin secretion	57	-0.480371	-1.66562	0.00252131	0.00732275	0.00422333	1631	tags=33%, list=10%, signal=30%	5567/801/1908/2977/808/5332/111/2770/5534/5530/117/3708/5532/5153/23236/5136/5593/4878/116
hsa04611	Platelet activation	108	0.430473	1.56013	0.00268781	0.00773903	0.00446342	3322	tags=43%, list=20%, signal=34%	2212/5742/2207/5739/10627/8673/1281/7408/3937/83706/1277/5603/4067/146850/23533/6916/60/6915/3688/5330/695/5294/3710/3673/6850/7450/5293/1278/9138/54518/84876/5908/5028/71/5336/9002/5023/7094/2771/5499/4638/2149/208/103910/5566/4846
hsa00480	Glutathione metabolism	48	0.533993	1.69045	0.00292166	0.00834047	0.00481029	5038	tags=62%, list=30%, signal=44%	290/493869/26873/2687/4258/6611/2876/2949/51056/2730/373156/6241/2882/2539/9588/27306/3417/4257/79094/51060/2879/79017/2937/9446/5226/6723/2950/2678/6240/2878
hsa05235	PD-L1 expression and PD-1 checkpoint pathway in cancer	83	0.469742	1.62743	0.00294766	0.00834337	0.00481196	3205	tags=40%, list=19%, signal=32%	1956/10538/29126/916/7097/5133/5606/5603/915/55509/5777/116071/4615/917/940/3460/920/7535/2353/3725/3932/5293/4772/6774/4773/4790/4794/919/148022/3265/6772/208/4793
hsa04810	Regulation of actin cytoskeleton	204	0.373391	1.46125	0.00326783	0.00917189	0.00528981	3394	tags=35%, list=20%, signal=28%	3678/1956/2335/4478/10451/624/3675/5154/5880/10627/10398/87/3689/3687/6237/10095/85477/7852/3672/2261/8826/3684/54961/3679/730/4627/7114/60/5216/3676/3695/2252/7409/3688/55970/3071/5159/10788/3683/81/3673/5293/80310/22801/9138/2260/128239/3691/10093/3696/71/5829/3693/6548/2246/5155/2768/2934/10109/3265/5499/4638/221178/2149/3985/208/103910/10298/10092/8515/10552
hsa05170	Human immunodeficiency virus 1 infection	181	0.379904	1.4664	0.00346513	0.00964462	0.00556245	3540	tags=41%, list=21%, signal=33%	200315/5880/60489/27350/1234/916/7133/7097/7132/140564/7852/5606/5603/915/684/200316/3106/4615/917/355/841/811/6890/3134/7465/920/8717/2793/2353/581/55970/3661/3725/3133/567/3105/2787/2923/8737/9582/3107/3710/356/7188/163688/85363/5293/891/4772/164668/5829/5336/836/4773/4790/9133/25939/130340/2783/94235/919/6892/2771/578/3265/1111/51135/3985/208/10298/3654/598/4776/995/4792
hsa04623	Cytosolic DNA-sensing pathway	47	0.52674	1.66514	0.0036544	0.0100874	0.0058178	3540	tags=40%, list=21%, signal=32%	3569/3553/6352/3627/834/29108/3665/3606/9641/5441/3661/11035/8737/4790/81030/10622/4793/51082/4792
hsa04217	Necroptosis	111	0.423276	1.52936	0.00386276	0.0105751	0.00609909	3648	tags=39%, list=22%, signal=31%	330/7128/3553/2512/5836/7132/3718/3552/834/197259/2495/29108/355/841/3460/8878/8717/8795/6776/581/1536/11035/8737/6778/356/7188/27243/8837/6773/8743/6774/114548/148022/8797/10616/5837/6772/81030/7297/7098/124044/6609/817
hsa01250	Biosynthesis of nucleotide sugars	32	0.573563	1.68406	0.00402829	0.0109386	0.00630875	4842	tags=56%, list=29%, signal=40%	3101/3099/9945/2645/91373/5373/6675/2821/55276/54187/140838/2582/5236/2762/55577/8790/29926/2584
hsa05163	Human cytomegalovirus infection	196	0.371093	1.44456	0.00406282	0.0109434	0.00631151	3027	tags=33%, list=18%, signal=28%	7422/6347/3569/1956/3553/6352/5880/1234/3554/3587/7132/1230/7852/5743/5603/1021/3106/4193/355/1026/841/811/5734/6890/3134/90993/8717/2793/1978/581/55970/3661/5330/3133/567/3105/2787/2923/8737/3107/3710/356/3588/3579/7188/163688/5293/3570/4772/9138/5732/64764/5829/6774/836/4773/4790/2783/94235/2768/6892/9586/2771/578/3265
hsa04540	Gap junction	79	-0.432448	-1.60022	0.00428019	0.0114367	0.006596	1631	tags=25%, list=10%, signal=23%	5567/2977/10382/5332/111/2770/51807/108/57369/3708/2915/23236/107/7277/2911/5593/1812/5579/3356/5582
hsa04310	Wnt signaling pathway	156	-0.349321	-1.44009	0.00439606	0.011653	0.00672079	3024	tags=32%, list=18%, signal=27%	2932/1501/1454/5578/10297/7482/84133/1488/7483/595/51701/147495/324/283106/6934/4040/85407/7481/7473/83439/85409/5567/5881/81029/5601/5332/10023/23500/5599/8945/5602/5534/818/816/8549/5530/340419/5532/147111/80319/6423/6425/23236/7472/11197/84870/7480/5579/5582/815
hsa04650	Natural killer cell mediated cytotoxicity	95	0.437572	1.54508	0.00446671	0.0117471	0.00677503	2506	tags=42%, list=15%, signal=36%	5551/3383/10451/2207/5880/3002/2214/3689/7305/3937/6464/80329/962/4068/5777/79465/3106/355/80328/100507436/3460/7409/8795/7535/10870/3932/3133/3683/3105/3107/356/6850/5293/4277/4772/5336/8743/836/4773/51744
hsa04964	Proximal tubule bicarbonate reclamation	20	-0.631841	-1.74797	0.00494651	0.0129073	0.00744417	3272	tags=65%, list=19%, signal=52%	8671/6550/480/5105/2747/2744/4190/762/481/486/27165/2746/478
hsa00010	Glycolysis / Gluconeogenesis	51	0.499791	1.60948	0.00625366	0.0161917	0.0093384	3232	tags=41%, list=19%, signal=33%	3101/3939/2203/3099/130589/221/5230/2645/5315/2597/83440/218/2023/387712/5106/2821/226/130/55276/5211/7167
hsa04141	Protein processing in endoplasmic reticulum	157	0.377056	1.4227	0.00823913	0.0211682	0.0122086	4853	tags=40%, list=29%, signal=29%	3310/23480/3337/23645/9601/91319/6238/85479/57134/5034/3309/811/1649/9871/581/55741/10960/2923/7494/64374/2081/10130/7184/23471/1650/10970/51726/6747/3998/29927/9695/5589/10134/5611/6185/6184/578/81567/10956/64215/3703/821/10113/23193/468/118424/10961/10952/3306/4780/26270/22872/10525/7841/5886/10802/6748/55768/823/9709/6396/4121/27102
hsa04614	Renin-angiotensin system	13	0.709984	1.69515	0.00955155	0.0241683	0.0139389	1844	tags=31%, list=11%, signal=27%	290/2028/5476/185
hsa05160	Hepatitis C	128	0.387136	1.41945	0.00949621	0.0241683	0.0139389	4853	tags=45%, list=29%, signal=32%	9021/1956/1366/3627/7132/9076/1021/355/3665/1026/841/9641/4600/8717/581/3661/4938/1017/8737/356/5293/4939/8837/6773/4940/6774/836/4790/148022/4599/578/91543/3265/6772/975/208/5010/7297/7098/4792/9071/3949/369/1950/23586/8772/1869/10062/3455/51208/29110/24146/5925/3551/207/5970/10379/27102
hsa04066	HIF-1 signaling pathway	100	0.406156	1.45707	0.00982789	0.0246806	0.0142343	2558	tags=31%, list=15%, signal=26%	7076/7422/3162/5054/3569/1956/3101/3939/4055/285/3099/4843/1026/3460/5230/1978/1536/5163/2064/2872/2597/5293/2056/3570/6513/2023/387712/5336/6774/7037/4790
hsa05215	Prostate cancer	92	0.426133	1.49889	0.010335	0.0257604	0.0148571	3167	tags=30%, list=19%, signal=25%	4318/5328/1956/7850/5154/6692/4193/5327/1026/51176/90993/5159/6932/2064/1017/5293/80310/4824/7184/64764/2260/4790/7039/5155/9586/2308/3265/208
hsa01523	Antifolate resistance	28	0.572509	1.63564	0.0133579	0.0330485	0.0190604	3565	tags=39%, list=21%, signal=31%	8714/3569/3553/2348/2352/7298/4363/4790/2350/6472/8836
hsa00250	Alanine, aspartate and glutamate metabolism	32	-0.506326	-1.55549	0.0135587	0.0332985	0.0192046	2628	tags=41%, list=16%, signal=34%	80150/84706/18/2747/2744/339983/7915/2805/284716/27165/2746/2571/2572
hsa03050	Proteasome	40	0.501229	1.53442	0.0150366	0.0366587	0.0211426	6259	tags=60%, list=37%, signal=38%	5698/5696/5721/11047/5714/5699/5704/5701/5691/5692/5720/5688/23198/5702/5689/5719/5718/51371/5705/5690/9491/9861/5715/5687
hsa05161	Hepatitis B	144	0.367838	1.37558	0.0178104	0.0431064	0.0248612	3540	tags=34%, list=21%, signal=27%	4318/3569/7097/3718/5606/5603/3339/4615/355/3665/1026/841/9641/90993/6776/2353/581/7040/3661/3725/7043/1017/1643/6778/356/5293/1959/4772/6773/64764/7042/7048/6774/836/4773/4790/332/148022/9586/843/3265/6772/51135/208/7297/3654/7098/4776/4792
hsa04660	T cell receptor signaling pathway	93	0.408092	1.43627	0.0191526	0.0460215	0.0265425	3253	tags=41%, list=19%, signal=33%	3586/10451/916/3937/1326/5133/3702/5603/915/5777/926/917/5788/940/920/925/7409/7535/9402/2353/3725/3932/7006/5293/4772/959/1493/4773/4790/4794/919/9020/84433/3265/8915/208/4793/10298
hsa04923	Regulation of lipolysis in adipocytes	47	-0.43825	-1.46145	0.0196854	0.0469636	0.0270859	2787	tags=40%, list=17%, signal=34%	5592/4852/5346/2167/5291/5295/153/364/5567/10000/111/2770/108/107/5593/5733/4878/4886/7253
